# Supplementary material
Source: MDPI journal article supplement (https://www.mdpi.com/2306-5710/7/4/74)
Supplement: s1 [file s1]

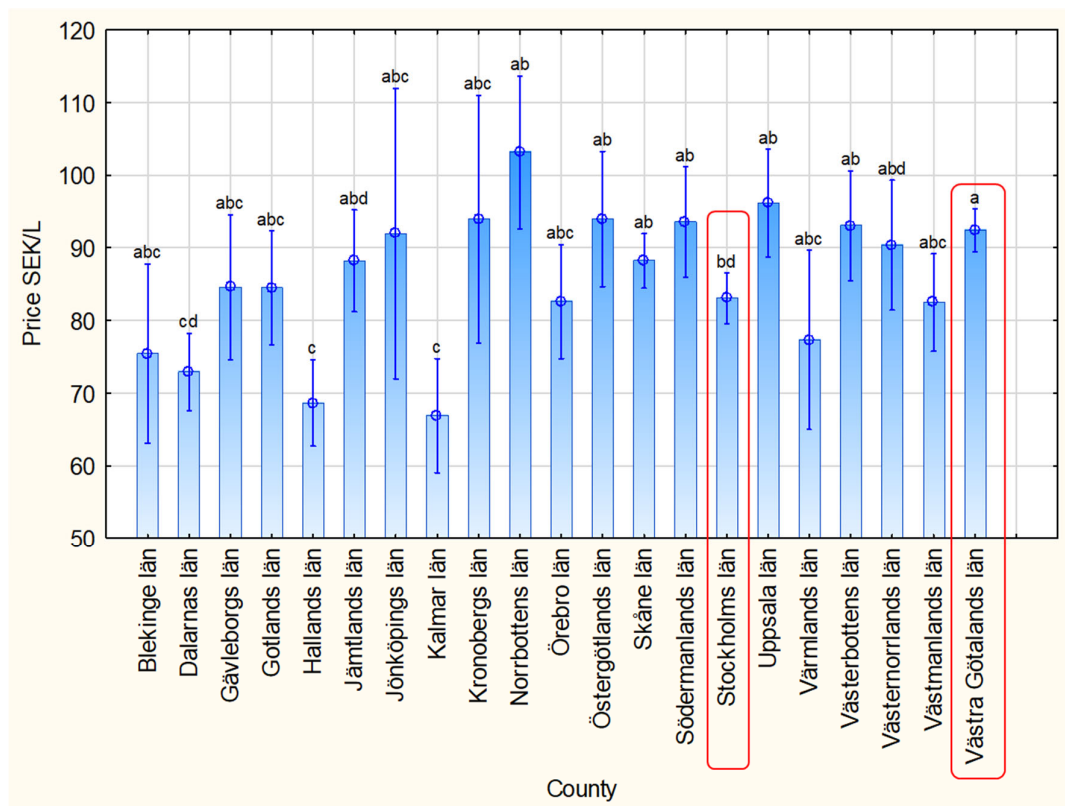

Figure S1. Average beer price (SEK/L) per county. Different letters indicates significant differences ( $p < 0.05$ ).

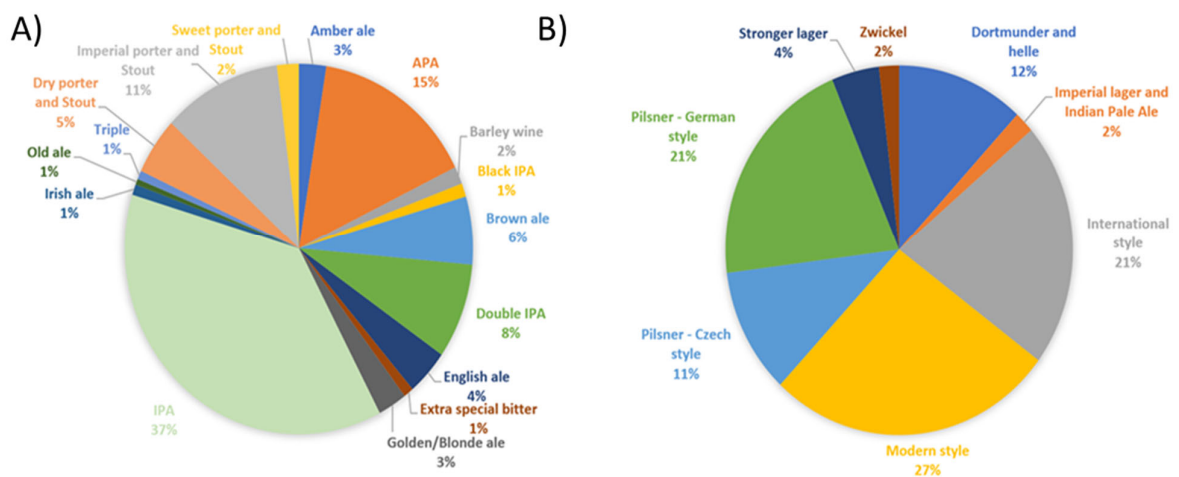

Figure S2. Pie-chart illustrating the representative % of the different beer styles from ale (A) and lager beers (B).
